# Supplementary material
Source: HighWire-hosted journal article supplement (http://molpharm.aspetjournals.org/highwire/filestream/80580/field_highwire_adjunct_files/0/Supplemental_108621FINAL.pdf)
Supplement: Supplemental_108621FINAL.pdf [file Supplemental_108621FINAL.pdf]

## **Supplemental Information**

### **Molecular basis of metabolism-mediated conversion of PK11195 from an antagonist to an agonist of the constitutive androstane receptor**

Bryan Mackowiak, Linhao Li, Matthew A. Welch, Daochuan Li, Jace W. Jones, Scott Heyward, Maureen A. Kane, Peter W. Swaan, and Hongbing Wang

Department of Pharmaceutical Sciences, University of Maryland School of Pharmacy, 20 Penn Street, Baltimore, MD 21201 (B.M, L.L, M.W, D.L, J.J, M.K, P.S, H.W); Bioreclamation In Vitro Technologies, 1450 S Rolling Rd, Halethorpe, MD 21227 (S.H)

#### **List of supplementary materials**

Fig. S1. Detailed parameters used for docking studies.

Table S1. Detailed interaction data for PK11195, ND-PK, CINPA1 and CITCO

Fig. S1. Detailed parameters used for docking studies.

| Dock Ligands (CDOCKER) <span style="float: right;">☐</span> |                                                          |
|-------------------------------------------------------------|----------------------------------------------------------|
| Parameter Name                                              | Parameter Value                                          |
| Input Receptor                                              | 1XVP-Dchain-ProteinOnly_Prepared:1XVP-Dchain-ProteinOnly |
| Input Ligands                                               | PK+desPK+CITCO+CINPA1_prepared:All                       |
| Input Site Sphere                                           | 24.9719, 54.7027, 29.512, 11.5                           |
| [-] Top Hits                                                | 10                                                       |
| Pose Cluster Radius                                         | 0.1                                                      |
| [-] Random Conformations                                    | 255                                                      |
| Dynamics Steps                                              | 1000                                                     |
| Dynamics Target Temperat...                                 | 1000                                                     |
| Include Electrostatic Intera...                             | True                                                     |
| [-] Orientations to Refine                                  | 10                                                       |
| Maximum Bad Orientations                                    | 800                                                      |
| Orientation vdW Energy Th...                                | 300                                                      |
| [-] Simulated Annealing                                     | True                                                     |
| Heating Steps                                               | 2000                                                     |
| Heating Target Temperature                                  | 700                                                      |
| Cooling Steps                                               | 5000                                                     |
| Cooling Target Temperature                                  | 300                                                      |
| [-] Advanced                                                |                                                          |
| Forcefield                                                  | CHARMm                                                   |
| Use Full Potential                                          | False                                                    |
| Ligand Partial Charge Meth...                               | Momany-Rone                                              |
| Final Minimization                                          | Full Potential                                           |
| Final Minimization Gradient...                              | 0                                                        |
| Prepare Input Receptor                                      | True                                                     |
| Grid Extension                                              | 8.0                                                      |
| Random Number Seed                                          | 314159 314159 314159 314159                              |
| [-] Parallel Processing                                     | False                                                    |

Table S1. Detailed interaction data for PK11195, ND-PK, CINPA1 and CITCO

| Interaction Distance Parameters         |                          |             |              |            |             |            |             |        |         |        |            |           |           |
|-----------------------------------------|--------------------------|-------------|--------------|------------|-------------|------------|-------------|--------|---------|--------|------------|-----------|-----------|
| Type                                    | Max. Distance (Å)        |             |              |            |             |            |             |        |         |        |            |           |           |
| Hydrophobic Alkyl                       | 5.50 From Alkyl Centroid |             |              |            |             |            |             |        |         |        |            |           |           |
| Hydrophobic Stacked Pi-Pi               | 6.00 From Centroids      |             |              |            |             |            |             |        |         |        |            |           |           |
| Hydrophobic Pi-Cation                   | 5.00                     |             |              |            |             |            |             |        |         |        |            |           |           |
| Hydrophobic Pi-Sulfur                   | 6.00                     |             |              |            |             |            |             |        |         |        |            |           |           |
| Hydrogen Bond                           | 3.80                     |             |              |            |             |            |             |        |         |        |            |           |           |
| Halogen non-bond                        | 3.70                     |             |              |            |             |            |             |        |         |        |            |           |           |
|                                         |                          |             |              |            |             |            |             |        |         |        |            |           |           |
| <b>(R)-N-Desmethyl PK11195</b>          |                          |             |              |            |             |            |             |        |         |        |            |           |           |
| Name                                    | Distance                 | Category    | Types        | From       | From Chem   | To         | To Chemist  | Theta  | Theta 2 | Gamma  | Closest At | Angle DHA | Angle HAY |
| D:CYS219:SG - (R)-N-Desmethyl PK11195   | 5.09136                  | Other       | Pi-Sulfur    | D:CYS219:S | Sulfur      | (R)-N-Desm | Pi-Orbitals | 83.821 |         |        |            |           |           |
| D:PHE161 - (R)-N-Desmethyl PK11195      | 5.05838                  | Hydrophob   | Pi-Pi T-shaj | D:PHE161   | Pi-Orbitals | (R)-N-Desm | Pi-Orbitals | 55.583 | 7.624   | 62.004 | 3.894      |           |           |
| D:PHE217 - (R)-N-Desmethyl PK11195      | 5.22081                  | Hydrophob   | Pi-Pi T-shaj | D:PHE217   | Pi-Orbitals | (R)-N-Desm | Pi-Orbitals | 19.891 | 61.533  | 67.143 | 3.802      |           |           |
| (R)-N-Desmethyl PK11195:C16 - D:MET168  | 4.76552                  | Hydrophob   | Alkyl        | (R)-N-Desm | Alkyl       | D:MET168   | Alkyl       |        |         |        |            |           |           |
| (R)-N-Desmethyl PK11195:C16 - D:VAL169  | 4.78439                  | Hydrophob   | Alkyl        | (R)-N-Desm | Alkyl       | D:VAL169   | Alkyl       |        |         |        |            |           |           |
| (R)-N-Desmethyl PK11195:C16 - D:CYS202  | 3.63591                  | Hydrophob   | Alkyl        | (R)-N-Desm | Alkyl       | D:CYS202   | Alkyl       |        |         |        |            |           |           |
| (R)-N-Desmethyl PK11195:C16 - D:LEU343  | 4.97352                  | Hydrophob   | Alkyl        | (R)-N-Desm | Alkyl       | D:LEU343   | Alkyl       |        |         |        |            |           |           |
| (R)-N-Desmethyl PK11195:CI24 - D:ILE164 | 4.8058                   | Hydrophob   | Alkyl        | (R)-N-Desm | Alkyl       | D:ILE164   | Alkyl       |        |         |        |            |           |           |
| (R)-N-Desmethyl PK11195:CI24 - D:MET168 | 5.1548                   | Hydrophob   | Alkyl        | (R)-N-Desm | Alkyl       | D:MET168   | Alkyl       |        |         |        |            |           |           |
| D:PHE161 - (R)-N-Desmethyl PK11195:CI24 | 4.90921                  | Hydrophob   | Pi-Alkyl     | D:PHE161   | Pi-Orbitals | (R)-N-Desm | Alkyl       |        |         |        |            |           |           |
| (R)-N-Desmethyl PK11195 - D:LEU206      | 4.53538                  | Hydrophob   | Pi-Alkyl     | (R)-N-Desm | Pi-Orbitals | D:LEU206   | Alkyl       |        |         |        |            |           |           |
|                                         |                          |             |              |            |             |            |             |        |         |        |            |           |           |
| <b>(R)-PK11195</b>                      |                          |             |              |            |             |            |             |        |         |        |            |           |           |
| Name                                    | Distance                 | Category    | Types        | From       | From Chem   | To         | To Chemist  | Theta  | Theta 2 | Gamma  | Closest At | Angle DHA | Angle HAY |
| D:CYS219:SG - (R)-PK11195               | 5.10412                  | Other       | Pi-Sulfur    | D:CYS219:S | Sulfur      | (R)-PK1119 | Pi-Orbitals | 84.2   |         |        |            |           |           |
| D:TYR224 - (R)-PK11195                  | 3.97653                  | Hydrophob   | Pi-Pi Stacke | D:TYR224   | Pi-Orbitals | (R)-PK1119 | Pi-Orbitals | 17.057 | 47.237  | 30.219 | 3.296      |           |           |
| D:PHE161 - (R)-PK11195                  | 5.25099                  | Hydrophob   | Pi-Pi T-shaj | D:PHE161   | Pi-Orbitals | (R)-PK1119 | Pi-Orbitals | 46.896 | 23.229  | 69.026 | 3.853      |           |           |
| D:PHE217 - (R)-PK11195                  | 5.07031                  | Hydrophob   | Pi-Pi T-shaj | D:PHE217   | Pi-Orbitals | (R)-PK1119 | Pi-Orbitals | 23.576 | 78.442  | 62.804 | 3.592      |           |           |
| (R)-PK11195:C16 - D:VAL169              | 5.43645                  | Hydrophob   | Alkyl        | (R)-PK1119 | Alkyl       | D:VAL169   | Alkyl       |        |         |        |            |           |           |
| (R)-PK11195:C16 - D:CYS202              | 4.1891                   | Hydrophob   | Alkyl        | (R)-PK1119 | Alkyl       | D:CYS202   | Alkyl       |        |         |        |            |           |           |
| (R)-PK11195:C16 - D:LEU343              | 4.92163                  | Hydrophob   | Alkyl        | (R)-PK1119 | Alkyl       | D:LEU343   | Alkyl       |        |         |        |            |           |           |
| (R)-PK11195:C17 - D:VAL199              | 4.26621                  | Hydrophob   | Alkyl        | (R)-PK1119 | Alkyl       | D:VAL199   | Alkyl       |        |         |        |            |           |           |
| (R)-PK11195:C18 - D:LEU206              | 4.73733                  | Hydrophob   | Alkyl        | (R)-PK1119 | Alkyl       | D:LEU206   | Alkyl       |        |         |        |            |           |           |
| (R)-PK11195:CI25 - D:ILE164             | 5.4936                   | Hydrophob   | Alkyl        | (R)-PK1119 | Alkyl       | D:ILE164   | Alkyl       |        |         |        |            |           |           |
| D:PHE161 - (R)-PK11195:CI25             | 4.42423                  | Hydrophob   | Pi-Alkyl     | D:PHE161   | Pi-Orbitals | (R)-PK1119 | Alkyl       |        |         |        |            |           |           |
| D:HIS203 - (R)-PK11195:C17              | 3.92296                  | Hydrophob   | Pi-Alkyl     | D:HIS203   | Pi-Orbitals | (R)-PK1119 | Alkyl       |        |         |        |            |           |           |
| D:HIS203 - (R)-PK11195:C18              | 3.89159                  | Hydrophob   | Pi-Alkyl     | D:HIS203   | Pi-Orbitals | (R)-PK1119 | Alkyl       |        |         |        |            |           |           |
| D:TYR224 - (R)-PK11195:CI25             | 4.65206                  | Hydrophob   | Pi-Alkyl     | D:TYR224   | Pi-Orbitals | (R)-PK1119 | Alkyl       |        |         |        |            |           |           |
| D:TYR326 - (R)-PK11195:C16              | 5.2036                   | Hydrophob   | Pi-Alkyl     | D:TYR326   | Pi-Orbitals | (R)-PK1119 | Alkyl       |        |         |        |            |           |           |
| D:TYR326 - (R)-PK11195:C17              | 3.69873                  | Hydrophob   | Pi-Alkyl     | D:TYR326   | Pi-Orbitals | (R)-PK1119 | Alkyl       |        |         |        |            |           |           |
| (R)-PK11195 - D:LEU206                  | 5.13931                  | Hydrophob   | Pi-Alkyl     | (R)-PK1119 | Pi-Orbitals | D:LEU206   | Alkyl       |        |         |        |            |           |           |
|                                         |                          |             |              |            |             |            |             |        |         |        |            |           |           |
| <b>CITCO</b>                            |                          |             |              |            |             |            |             |        |         |        |            |           |           |
| Name                                    | Distance                 | Category    | Types        | From       | From Chem   | To         | To Chemist  | Theta  | Theta 2 | Gamma  | Closest At | Angle DHA | Angle HAY |
| CITCO:H28 - D:ASN165:O                  | 2.98476                  | Hydrogen E  | Carbon Hyc   | CITCO:H28  | H-Donor     | D:ASN165:  | H-Acceptor  |        |         |        |            | 122.005   | 104.227   |
| D:THR225:O - CITCO:CI3                  | 3.10208                  | Halogen     | Halogen (C   | D:THR225:  | Halogen Ac  | CITCO:CI3  | Halogen     |        |         |        |            |           |           |
| D:TYR224 - CITCO                        | 4.53248                  | Hydrophob   | Pi-Pi Stacke | D:TYR224   | Pi-Orbitals | CITCO      | Pi-Orbitals | 41.915 | 18.087  | 26.509 | 3.725      |           |           |
| CITCO - D:TYR326                        | 4.9482                   | Hydrophob   | Pi-Pi Stacke | CITCO      | Pi-Orbitals | D:TYR326   | Pi-Orbitals | 61.348 | 33.931  | 27.432 | 3.651      |           |           |
| CITCO - D:TYR326                        | 4.83915                  | Hydrophob   | Pi-Pi Stacke | CITCO      | Pi-Orbitals | D:TYR326   | Pi-Orbitals | 59.754 | 37.409  | 26.434 | 3.414      |           |           |
| D:PHE217 - CITCO                        | 5.5592                   | Hydrophob   | Pi-Pi T-shaj | D:PHE217   | Pi-Orbitals | CITCO      | Pi-Orbitals | 27.909 | 87.971  | 74.704 | 3.874      |           |           |
| D:PHE234 - CITCO                        | 5.69556                  | Hydrophob   | Pi-Pi T-shaj | D:PHE234   | Pi-Orbitals | CITCO      | Pi-Orbitals | 28.965 | 80.172  | 63.598 | 4.009      |           |           |
| CITCO:CI2 - D:VAL232                    | 4.97312                  | Hydrophob   | Alkyl        | CITCO:CI2  | Alkyl       | D:VAL232   | Alkyl       |        |         |        |            |           |           |
| D:PHE161 - CITCO:CI2                    | 4.62547                  | Hydrophob   | Pi-Alkyl     | D:PHE161   | Pi-Orbitals | CITCO:CI2  | Alkyl       |        |         |        |            |           |           |
| CITCO - D:VAL199                        | 4.90943                  | Hydrophob   | Pi-Alkyl     | CITCO      | Pi-Orbitals | D:VAL199   | Alkyl       |        |         |        |            |           |           |
| CITCO - D:CYS202                        | 4.24481                  | Hydrophob   | Pi-Alkyl     | CITCO      | Pi-Orbitals | D:CYS202   | Alkyl       |        |         |        |            |           |           |
| CITCO - D:LEU242                        | 5.3192                   | Hydrophob   | Pi-Alkyl     | CITCO      | Pi-Orbitals | D:LEU242   | Alkyl       |        |         |        |            |           |           |
|                                         |                          |             |              |            |             |            |             |        |         |        |            |           |           |
| <b>CINPA1</b>                           |                          |             |              |            |             |            |             |        |         |        |            |           |           |
| Name                                    | Distance                 | Category    | Types        | From       | From Chem   | To         | To Chemist  | Theta  | Theta 2 | Gamma  | Closest At | Angle DHA | Angle HAY |
| CINPA1:H53 - D:HIS203:NE2               | 3.0321                   | Hydrogen E  | Conventio    | CINPA1:H5  | H-Donor     | D:HIS203:N | H-Acceptor  |        |         |        |            | 105.622   | 103.127   |
| CINPA1:N5 - D:PHE217                    | 4.78064                  | Electrostat | Pi-Cation    | CINPA1:N5  | Positive    | D:PHE217   | Pi-Orbitals | 17.465 |         |        |            |           |           |
| CINPA1:N5 - D:TYR224                    | 4.63361                  | Electrostat | Pi-Cation    | CINPA1:N5  | Positive    | D:TYR224   | Pi-Orbitals | 16.372 |         |        |            |           |           |
| D:PHE161 - CINPA1                       | 4.83154                  | Hydrophob   | Pi-Pi T-shaj | D:PHE161   | Pi-Orbitals | CINPA1     | Pi-Orbitals | 52.712 | 9.523   | 59.115 | 3.758      |           |           |
| D:PHE161 - CINPA1                       | 4.87591                  | Hydrophob   | Pi-Pi T-shaj | D:PHE161   | Pi-Orbitals | CINPA1     | Pi-Orbitals | 27.502 | 44.886  | 72.293 | 3.355      |           |           |
| D:TYR224 - CINPA1                       | 5.72976                  | Hydrophob   | Pi-Pi T-shaj | D:TYR224   | Pi-Orbitals | CINPA1     | Pi-Orbitals | 60.391 | 24.992  | 63.252 | 4.185      |           |           |
| CINPA1:C29 - D:VAL169                   | 5.4707                   | Hydrophob   | Alkyl        | CINPA1:C2  | Alkyl       | D:VAL169   | Alkyl       |        |         |        |            |           |           |
| CINPA1:C29 - D:VAL199                   | 4.21449                  | Hydrophob   | Alkyl        | CINPA1:C2  | Alkyl       | D:VAL199   | Alkyl       |        |         |        |            |           |           |
| CINPA1:C29 - D:CYS202                   | 4.27499                  | Hydrophob   | Alkyl        | CINPA1:C2  | Alkyl       | D:CYS202   | Alkyl       |        |         |        |            |           |           |
| CINPA1:C29 - D:LEU343                   | 4.79888                  | Hydrophob   | Alkyl        | CINPA1:C2  | Alkyl       | D:LEU343   | Alkyl       |        |         |        |            |           |           |
| D:PHE161 - CINPA1                       | 5.34892                  | Hydrophob   | Pi-Alkyl     | D:PHE161   | Pi-Orbitals | CINPA1     | Alkyl       |        |         |        |            |           |           |
| D:PHE234 - CINPA1                       | 5.41533                  | Hydrophob   | Pi-Alkyl     | D:PHE234   | Pi-Orbitals | CINPA1     | Alkyl       |        |         |        |            |           |           |
| D:TYR326 - CINPA1:C29                   | 4.63774                  | Hydrophob   | Pi-Alkyl     | D:TYR326   | Pi-Orbitals | CINPA1:C2  | Alkyl       |        |         |        |            |           |           |
